# Supplementary material
Source: Springer Nature journal article supplement (https://www.springermedizin.de/resource/supplementary/12913_2007_734_MOESM1_ESM.pdf/9535432)
Supplement: MOESM1 [file 9535432]

***Model Input:***

- Clinic variables
- Patient demographic information
- Patient enrollment plan

**Relational Database**

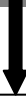

***The Clinic Model:***

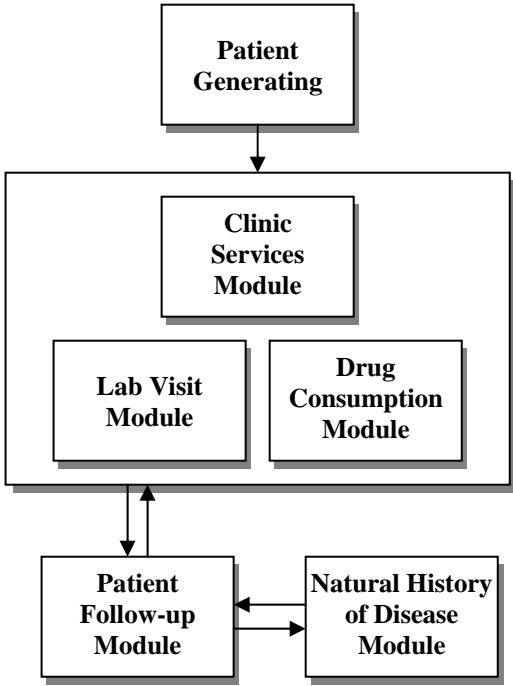

**Simulation Engine**

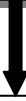

***Model Output:***

- Resource utilization
- Drug consumption
- Clinic capacity
- Evaluation of policy changes
- Staffing plan

**Relational Database**
